# Supplementary material for: Fabrication of multicolored patterns based on dye-doped cholesteric liquid crystals
Source: Royal Society of Chemistry journal article supplement (doi:10.1039/c9pp00150f), 2019-05-03
Supplement: c9pp00150f1.pdf [file c9pp00150f1.pdf]

## Supporting Information

### **Fabrication of multicolored patterns based on dye-doped cholesteric liquid crystals**

Linlin Xu<sup>a</sup>, Hanbing Zhang<sup>a</sup>, and Jie Wei<sup>a,b\*</sup>

<sup>a</sup> *College of Materials Science and Engineering, Beijing University of Chemical  
Technology, Beijing 100029, P. R. China.*

<sup>b</sup> *Beijing Engineering Research Center for the Synthesis and Applications of  
Waterborne Polymers, Beijing 100029, P. R. China.*

#### **Corresponding Author**

\*E-mail: [weij@mail.buct.edu.cn](mailto:weij@mail.buct.edu.cn) (J. Wei)

## 1. Reflection wavelength of cholesteric liquid crystals

Table S1 The specific formula ratio of the CLC.

| C6M<br>(wt%) | HCM-021<br>(wt%) | HCM-020<br>(wt%) | R1011<br>(wt%) | Darocur 784<br>(wt%) | Wavelength<br>(nm) |
|--------------|------------------|------------------|----------------|----------------------|--------------------|
| 68.5         | 10               | 10               | 11.5           | 2                    | 415                |
| 69.0         | 10               | 10               | 11.0           | 2                    | 425                |
| 69.5         | 10               | 10               | 10.5           | 2                    | 450                |
| 70.0         | 10               | 10               | 10.0           | 2                    | 485                |
| 70.5         | 10               | 10               | 9.5            | 2                    | 505                |
| 71.0         | 10               | 10               | 9.0            | 2                    | 520                |
| 71.5         | 10               | 10               | 8.5            | 2                    | 530                |
| 72.0         | 10               | 10               | 8.0            | 2                    | 550                |
| 72.2         | 10               | 10               | 7.8            | 2                    | 580                |
| 72.5         | 10               | 10               | 7.5            | 2                    | 630                |
| 73.0         | 10               | 10               | 7.0            | 2                    | 660                |

## 2. Characterization of fluorescent dyes

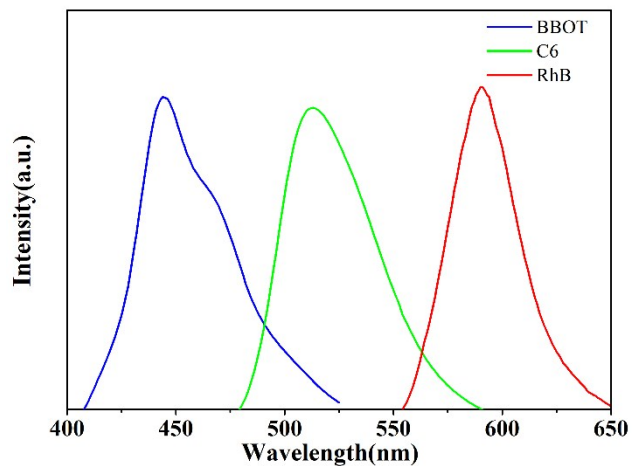

Fig. S1 Emission spectra of fluorescent dyes for BBOT, C6 and RhB.

### 3. Characterization of blank control film

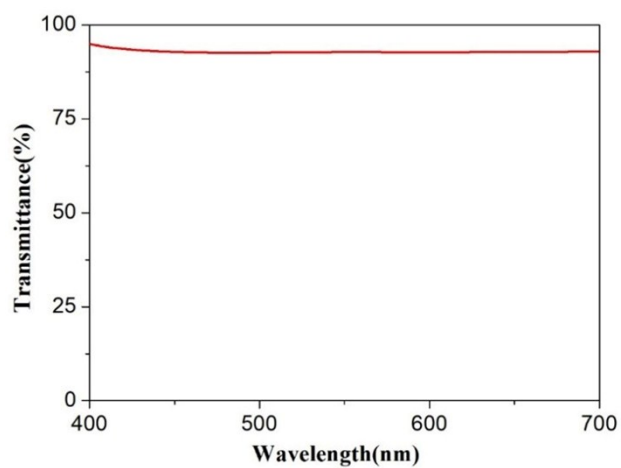

Fig. S2 The transmittance of blank control film.

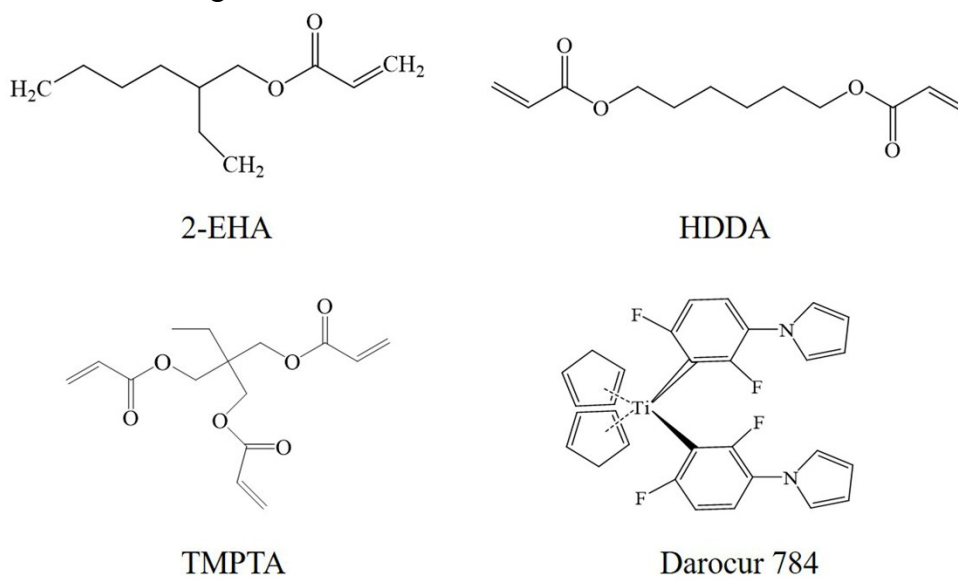

Fig. S3 The components of blank control film.

### 4. In-situ fluorescence regulation of CLC/BBOT

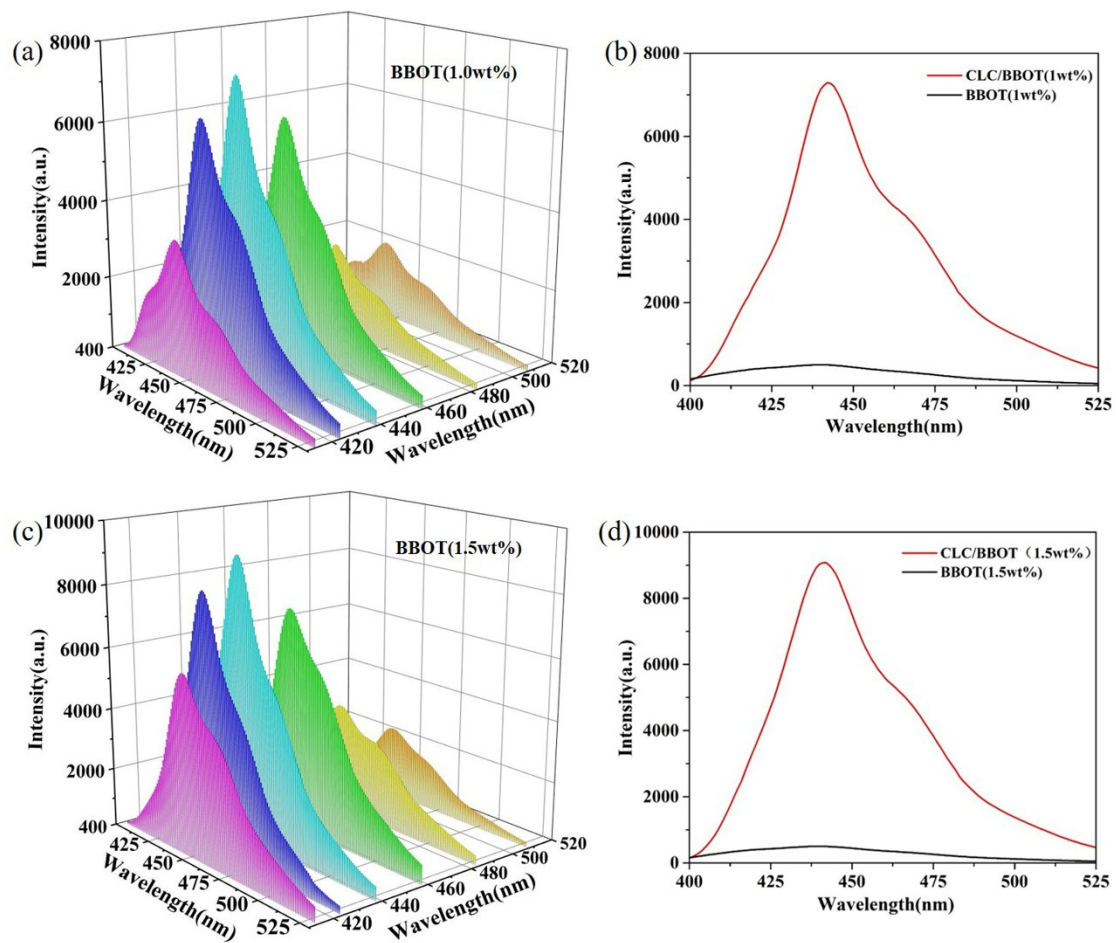

Fig. S4 (a) CLC/BBOT (1.0 wt%) fluorescence enhancement curve controlled by wavelength of CLC. (b) The maximum fluorescence curves of CLC/ BBOT and pure BBOT (1.0 wt%). (c) CLC/BBOT (1.5 wt%) fluorescence enhancement curve controlled by wavelength of CLC. (d) The maximum fluorescence curves of CLC/ BBOT and pure BBOT (1.5 wt%).
